# Supplementary material
Source: PubMed Central journal article supplement (PMC7255193)
Supplement: mmc1.pdf [file mmc1.pdf]

# THE LANCET

## Supplementary appendix

This appendix formed part of the original submission and has been peer reviewed.  
We post it as supplied by the authors.

Supplement to: Zhu F-C, Li Y-H, Guan X-H, et al. Safety, tolerability, and immunogenicity of a recombinant adenovirus type-5 vectored COVID-19 vaccine: a dose-escalation, open-label, non-randomised, first-in-human trial. *Lancet* 2020; published online May 22. [https://doi.org/10.1016/S0140-6736\(20\)31208-3](https://doi.org/10.1016/S0140-6736(20)31208-3).

# Appendix

## Content

|                                                                                                                                                                                                                                  |    |
|----------------------------------------------------------------------------------------------------------------------------------------------------------------------------------------------------------------------------------|----|
| Appendix 1. Trial profile.....                                                                                                                                                                                                   | 2  |
| Appendix 2. List of severe (grade 3) adverse reactions reported within 28 days of follow-up.....                                                                                                                                 | 3  |
| Appendix 3. Logistic regression analysis of the incidence of fever with the baseline characters, vaccine dose and pre-existing Ad5 antibodies.....                                                                               | 4  |
| Appendix 4. Abnormal changes of laboratory tests on day 7 after vaccination.....                                                                                                                                                 | 5  |
| Appendix 5. Specific antibody responses to spike glycoprotein, neutralizing antibodies to pseudovirus at day 14 and 28 post-vaccination.....                                                                                     | 6  |
| Appendix 6. The association between neutralizing antibodies to live SARS-CoV-2 and ELISA antibodies to receptor binding domain, spike glycoprotein, or pseudovirus-based neutralizing antibodies at day 28 post-vaccination..... | 7  |
| Appendix 7. Specific antibody responses to receptor binding domain, spike glycoprotein, neutralizing antibodies to live SARS-CoV-2 or to pseudovirus at day 14 and 28 post-vaccination according to pre-existing Ad5.....        | 8  |
| Appendix 8. Logistic regression analysis of seroconversion rate of neutralizing antibodies to live SARS-CoV-2 at day 28 post-vaccination with the baseline characters, vaccine dose and pre-existing Ad5 antibodies.....         | 11 |
| Appendix 9. Specific neutralizing antibodies to Ad5 vector at day 14 and 28 post-vaccination according to pre-existing Ad5.....                                                                                                  | 12 |
| Appendix 10. T cells producing combination of INF- $\gamma$ , TNF- $\alpha$ , and IL-2 at day 28 post-vaccination measured by flow cytometry.....                                                                                | 13 |
| Appendix 11. Stratified analyses of the T cell responses based on the pre-existing Ad5 neutralizing antibody titers measured by flow cytometry.....                                                                              | 14 |
| Appendix 12. Proportion of participants with either seroconversion of neutralizing antibodies to live SARS-CoV-2 or a positive T cell response measured by INF- $\gamma$ ELISpot at day 14 and 28 post-vaccination.....          | 17 |

**Appendix 1. Trial profile.**

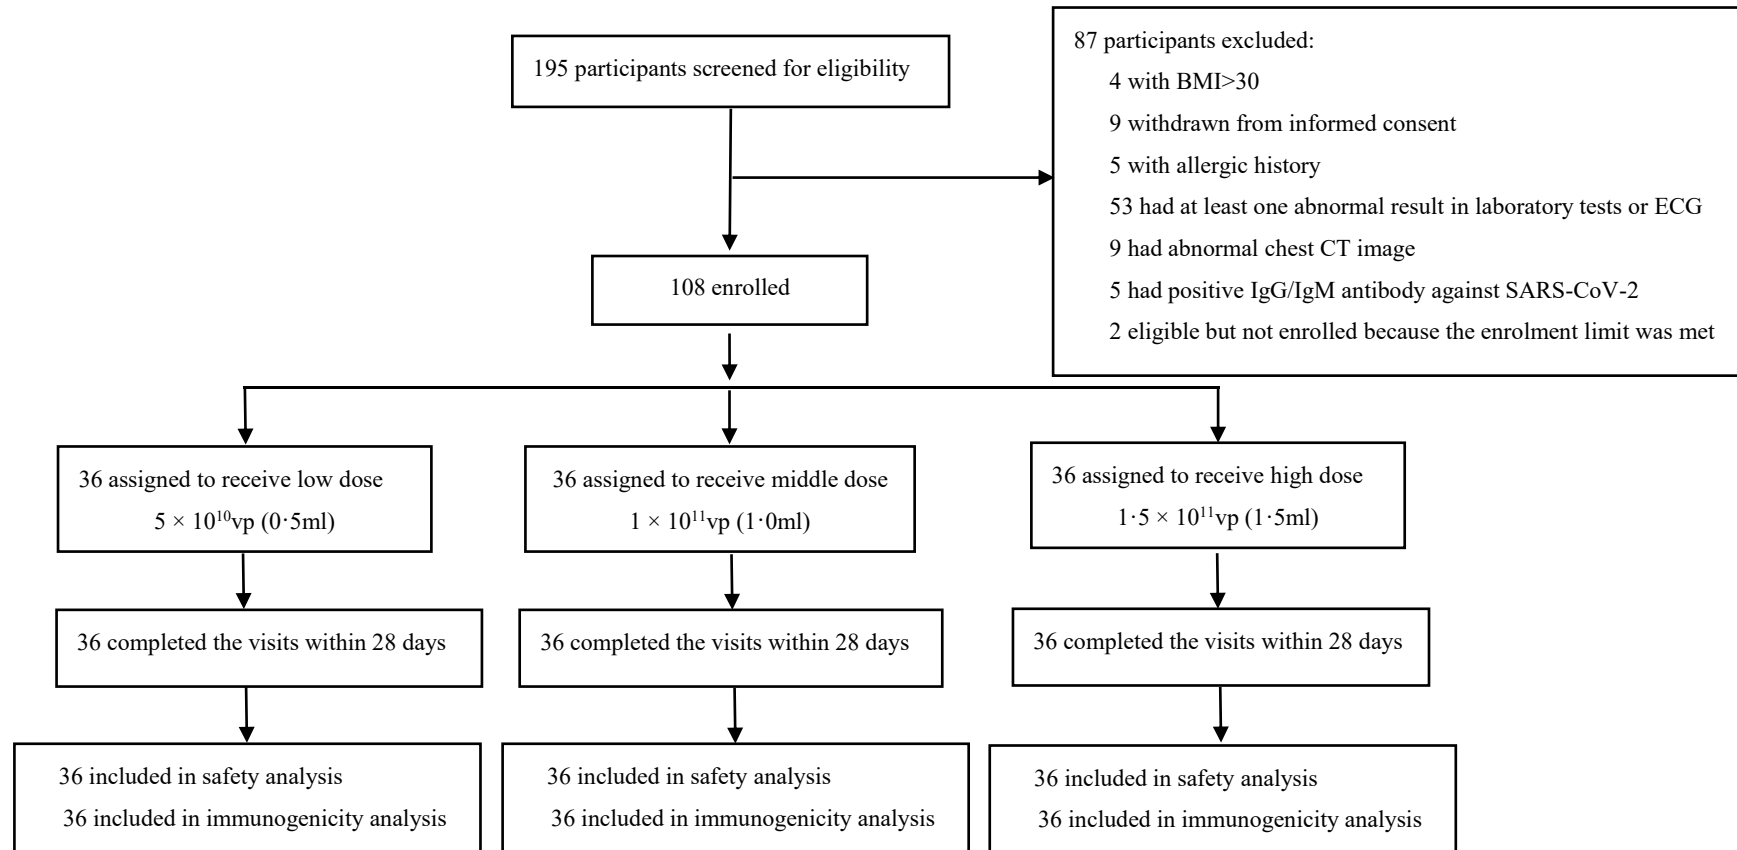

BMI=body mass index. ECG=electrocardiograph. CT=computerized tomography. IgG=immunoglobulin G. IgM=immunoglobulin M. SARS-CoV-2= severe acute respiratory syndrome coronavirus 2.

**Appendix 2. List of severe (grade 3) adverse reactions reported within 28 days of follow-up.**

| <b>ID of participants</b> | <b>Dose group</b> | <b>Symptom</b> | <b>Grade</b> | <b>Start time</b>       | <b>Resolve time</b> | <b>Treatment</b>        |
|---------------------------|-------------------|----------------|--------------|-------------------------|---------------------|-------------------------|
| <b>027</b>                | Low dose          | Fever          | 3            | Day 0 after vaccination | 48h                 | No treatment            |
| <b>029</b>                | Low dose          | Fever          | 3            | Day 1 after vaccination | 24h                 | No treatment            |
| <b>060</b>                | Middle dose       | Fever          | 3            | Day 1 after vaccination | 48h                 | No treatment            |
| <b>067</b>                | Middle dose       | Fever          | 3            | Day 1 after vaccination | 48h                 | No treatment            |
| <b>075</b>                | High dose         | Fever          | 3            | Day 1 after vaccination | 48h                 | Self-purchased medicine |
|                           |                   | Dyspnea        | 3            | Day 1 after vaccination | 24h                 | No treatment            |
|                           |                   | Fatigue        | 3            | Day 1 after vaccination | 48h                 | No treatment            |
|                           |                   | Muscle pain    | 3            | Day 1 after vaccination | 48h                 | No treatment            |
| <b>077</b>                | High dose         | Fever          | 3            | Day 1 after vaccination | 24h                 | No treatment            |
| <b>078</b>                | High dose         | Fatigue        | 3            | Day 0 after vaccination | 24h                 | No treatment            |
|                           |                   | Joint pain     | 3            | Day 0 after vaccination | 24h                 | No treatment            |
| <b>080</b>                | High dose         | Fever          | 3            | Day 1 after vaccination | 48h                 | No treatment            |
| <b>082</b>                | High dose         | Fever          | 3            | Day 1 after vaccination | 48h                 | No treatment            |
| <b>087</b>                | High dose         | Fever          | 3            | Day 1 after vaccination | 48h                 | Self-purchased medicine |

**Appendix 3. Logistic regression analysis of the incidence of fever with the baseline characters, vaccine dose and pre-existing Ad5 antibodies.**

| Model parameters                   | Estimates | P value | OR              |               |
|------------------------------------|-----------|---------|-----------------|---------------|
|                                    |           |         | Point estimates | 95%CI by Wald |
| <b>Univariate analysis*</b>        |           |         |                 |               |
| Middle dose                        | 0·00      | >0·99   | 1·00            | 0·39, 2·55    |
| High dose                          | 0·56      | 0·24    | 1·75            | 0·69, 4·45    |
| Age                                | 0·939     | 0·049   | 2·56            | 1·01, 6·51    |
| Sex                                | -0·52     | 0·18    | 0·60            | 0·28, 1·28    |
| Pre-existing Ad5 antibodies (>200) | -1·31     | 0·0013  | 0·27            | 0·12, 0·60    |
| <b>Multivariate analysis†</b>      |           |         |                 |               |
| Intercept                          | 0·09      | 0·85    |                 |               |
| Middle dose                        | -0·04     | 0·95    | 0·97            | 0·35, 2·66    |
| High dose                          | 0·39      | 0·45    | 1·48            | 0·54, 4·07    |
| Age                                | 0·53      | 0·042   | 2·87            | 1·04, 7·94    |
| Sex                                | -0·32     | 0·14    | 0·53            | 0·23, 1·23    |
| Pre-existing Ad5 antibodies (>200) | -1·26     | 0·0028  | 0·28            | 0·12, 0·65    |

\* The dose group (the low-dose group as the reference), age (stratified into 18-44, 45-60; using 45-60 years as reference), sex (female as reference), and the level of Ad5 antibodies pre-vaccination ( $\leq 200$  as reference) are analysed in univariate logistic regression, respectively, before involved in a multivariable analysis. † The occurrence of adverse reactions (fever) is the dependent variable. The independent variables are the dose group (the low-dose group was the reference), age (stratified into 18-44, 45-60; using 45-60 years as reference), sex (female as reference), and the level of Ad5 antibodies pre-vaccination ( $\leq 200$  as reference).

**Appendix 4. Abnormal changes of laboratory tests on day 7 after vaccination.**

| <b>Laboratory measures</b>      |         | <b>Low dose<br/>(n=36)</b> | <b>Middle dose<br/>(n=36)</b> | <b>High dose<br/>(n=36)</b> | <b>Total</b> |
|---------------------------------|---------|----------------------------|-------------------------------|-----------------------------|--------------|
| <b>Platelet decrease</b>        | Any     | 1 (3)                      | 1 (3)                         | 2 (6)                       | 4 (4)        |
|                                 | Grade 1 | 1 (3)                      | 0 (0)                         | 1 (3)                       | 2 (2)        |
|                                 | Grade 2 | 0 (0)                      | 1 (3)                         | 1 (3)                       | 2 (2)        |
| <b>ALT increase</b>             | Any     | 2 (6)                      | 5 (14)                        | 3 (8)                       | 10 (9)       |
|                                 | Grade 1 | 2 (6)                      | 5 (14)                        | 3 (8)                       | 10 (9)       |
| <b>AST increase</b>             | Any     | 0 (0)                      | 0 (0)                         | 1 (3)                       | 1 (1)        |
|                                 | Grade 1 | 0 (0)                      | 0 (0)                         | 1 (3)                       | 1 (1)        |
| <b>Hyperglycemia (fasting)</b>  | Any     | 1 (3)                      | 1 (3)                         | 2 (6)                       | 4 (4)        |
|                                 | Grade 1 | 0 (0)                      | 1 (3)                         | 0 (0)                       | 1 (1)        |
|                                 | Grade 2 | 1 (3)                      | 0 (0)                         | 2 (6)                       | 3 (3)        |
| <b>Total bilirubin increase</b> | Any     | 4 (11)                     | 1 (3)                         | 4 (11)                      | 9 (8)        |
|                                 | Grade 1 | 4 (11)                     | 0 (0)                         | 3 (8)                       | 7 (6)        |
|                                 | Grade 2 | 0 (0)                      | 1 (3)                         | 1 (3)                       | 2 (2)        |

Data are n (%). ALT= alanine aminotransferase. AST= aspartate aminotransferase.

**Appendix 5. Specific antibody responses to spike glycoprotein, neutralizing antibodies to pseudovirus at day 14 and 28 post-vaccination.**

|                                                 | Day 14                |                       |                        |         | Day 28                 |                        |                        |         |
|-------------------------------------------------|-----------------------|-----------------------|------------------------|---------|------------------------|------------------------|------------------------|---------|
|                                                 | Low dose<br>(n=36)    | Middle dose<br>(n=36) | High dose<br>(n=36)    | P value | Low dose<br>(n=36)     | Middle dose<br>(n=36)  | High dose<br>(n=36)    | P value |
| <b>ELISA antibodies to spike glycoprotein</b>   |                       |                       |                        |         |                        |                        |                        |         |
| <b>GMT</b>                                      | 130.0<br>(83.0-203.7) | 92.9<br>(64.9-132.9)  | 199.3<br>(141.7-280.2) | 0.020*  | 385.1<br>(284.8-520.5) | 345.6<br>(247.8-482.0) | 596.4<br>(440.0-808.4) | 0.034** |
| <b>≥4-fold increase</b>                         | 15, 42%               | 22, 61%               | 25, 69%                | 0.050†  | 32, 89%                | 32, 89%                | 30, 83%                | 0.82    |
| <b>Neutralization antibodies to pseudovirus</b> |                       |                       |                        |         |                        |                        |                        |         |
| <b>GMT</b>                                      | 18.5<br>(11.1-31.1)   | 16.4<br>(10.8-24.9)   | 29.2<br>(18.9-45.3)    | 0.17    | 29.8<br>(18.4-48.1)    | 27.3<br>(16.9-44.3)    | 45.6<br>(28.4-73.0)    | 0.26    |
| <b>≥4-fold increase</b>                         | 16, 44%               | 17, 47%               | 21, 58%                | 0.46    | 21, 58%                | 19, 53%                | 25, 69%                | 0.34    |

Data are mean (95%CI) or n, %. n = number of participants. % = proportion of participants. ELISA=enzyme-linked immunosorbent assay. GMT= geometric mean antibody titer. The p values are the result of comparison between the three dose groups. The Student-Newman-Keuls test was used for multicomparison of GMTs. \* The difference between high dose and middle dose was 149.2, with 95%CI 10.2~288.1. \*\* The difference between high dose and low dose was 280.2, with 95%CI 29.8~530.6; and the difference between high dose and low dose was 281.5, with 95%CI 31.1~531.9. † Only a margin of significance was found across the groups, and no significant difference was found after a Bonferroni correction for multicomparisons.

**Appendix 6. The association between neutralizing antibodies to live SARS-CoV-2 and ELISA antibodies to receptor binding domain, spike glycoprotein, or pseudovirus-based neutralizing antibodies at day 28 post-vaccination.**

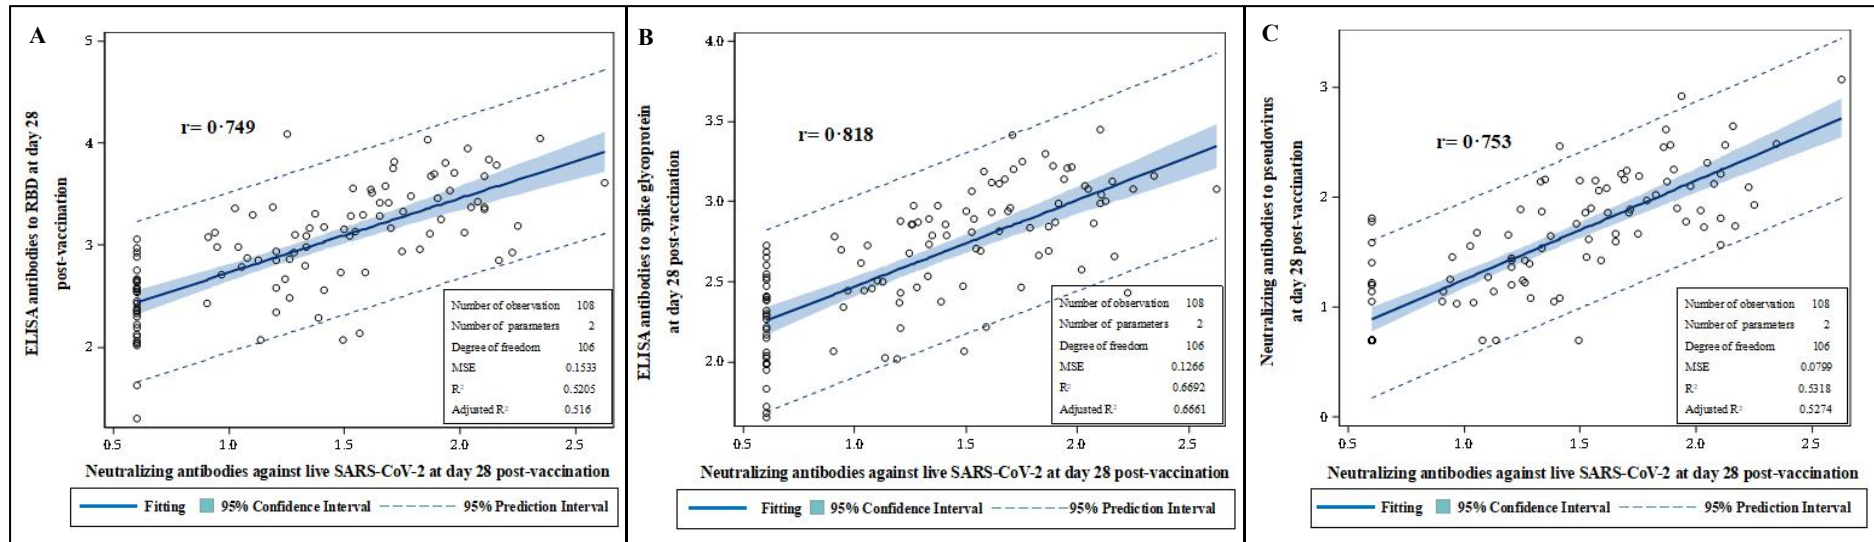

RBD= receptor binding domain. Panel A shows the association between binding antibodies to RBD and neutralizing antibodies to live virus at day 28 post-vaccination. Panel B shows the association between binding antibodies to spike glycoprotein and neutralizing antibodies to live SARS-CoV-2 at day 28 post-vaccination. Panel C shows the association between neutralizing antibodies to pseudovirus and live SARS-CoV-2 at day 28 post-vaccination.



**Appendix 7. Specific antibody responses to receptor binding domain, spike glycoprotein, neutralizing antibodies to live SARS-CoV-2 or to pseudovirus at day 14 and 28 post-vaccination according to pre-existing Ad5.**

|                                               | Day 14                 |                        |                        |         | Day 28                   |                          |                           |         |
|-----------------------------------------------|------------------------|------------------------|------------------------|---------|--------------------------|--------------------------|---------------------------|---------|
|                                               | Low dose               | Middle dose            | High dose              | P value | Low dose                 | Middle dose              | High dose                 | P value |
| <b>ELISA antibodies to RBD</b>                |                        |                        |                        |         |                          |                          |                           |         |
| Pre-existing Ad5 $\leq$ 200                   |                        |                        |                        |         |                          |                          |                           |         |
| n                                             | 16                     | 17                     | 20                     |         | 16                       | 17                       | 20                        |         |
| GMT                                           | 225.4<br>(92.9-546.8)  | 224.5<br>(139.1-362.4) | 270.9<br>(142.5-514.9) | 0.89    | 1013.3<br>(468.2-2192.7) | 1444.7<br>(882.8-2364.3) | 2275.9<br>(1231.3-4206.6) | 0.16    |
| $\geq$ 4-fold increase                        | 12, 75%                | 14, 82%                | 16, 80%                | 0.92    | 15, 94%                  | 17, 100%                 | 20, 100%                  | 0.30    |
| Pre-existing Ad5 $>$ 200                      |                        |                        |                        |         |                          |                          |                           |         |
| n                                             | 20                     | 19                     | 16                     |         | 20                       | 19                       | 16                        |         |
| GMT                                           | 32.2<br>(21.0-49.4)    | 40.7<br>(21.1-78.3)    | 54.3<br>(30.9-95.4)    | 0.39    | 413.5<br>(273.4-625.2)   | 478.2<br>(259.5-881.0)   | 820.0<br>(473.4-1420.5)   | 0.15    |
| $\geq$ 4-fold increase                        | 4, 20%                 | 4, 21%                 | 6, 38%                 | 0.50    | 20, 100%                 | 17, 89%                  | 16, 100%                  | 0.20    |
| <b>ELISA antibodies to spike glycoprotein</b> |                        |                        |                        |         |                          |                          |                           |         |
| Pre-existing Ad5 $\leq$ 200                   |                        |                        |                        |         |                          |                          |                           |         |
| n                                             | 16                     | 17                     | 20                     |         | 16                       | 17                       | 20                        |         |
| GMT                                           | 326.5<br>(191.5-556.8) | 164.7<br>(109.6-247.5) | 306.2<br>(196.4-477.4) | 0.064   | 619.1<br>(392.6-976.2)   | 499.8<br>(324.0-771.0)   | 818.3<br>(529.5-1264.4)   | 0.24    |
| $\geq$ 4-fold increase                        | 11, 69%                | 14, 82%                | 15, 75%                | 0.61    | 13, 81%                  | 16, 94%                  | 17, 85%                   | 0.60    |
| Pre-existing Ad5 $>$ 200                      |                        |                        |                        |         |                          |                          |                           |         |
| n                                             | 20                     | 19                     | 16                     |         | 20                       | 19                       | 16                        |         |
| GMT                                           | 62.3                   | 55.7                   | 116.5                  | 0.073   | 263.3                    | 248.4                    | 401.6                     | 0.19    |

|                                                   | Day 14       |             |              |         | Day 28        |               |               |         |
|---------------------------------------------------|--------------|-------------|--------------|---------|---------------|---------------|---------------|---------|
|                                                   | Low dose     | Middle dose | High dose    | P value | Low dose      | Middle dose   | High dose     | P value |
|                                                   | (37.6-103.2) | (34.1-90.9) | (75.2-180.4) |         | (186.5-371.9) | (153.3-402.7) | (276.5-583.2) |         |
| ≥4-fold increase                                  | 4, 20%       | 8, 42%      | 10, 63%      | 0.034*  | 19, 95%       | 16, 84%       | 13, 81%       | 0.36    |
| <b>Neutralizing antibodies to live SARS-CoV-2</b> |              |             |              |         |               |               |               |         |
| Pre-existing Ad5≤200                              |              |             |              |         |               |               |               |         |
| n                                                 | 16           | 17          | 20           |         | 16            | 17            | 20            |         |
| GMT                                               | 16.1         | 17.3        | 25.3         | 0.40    | 30.6          | 27.8          | 50.2          | 0.26    |
|                                                   | (9.0-28.8)   | (9.5-31.7)  | (15.8-40.6)  |         | (16.9-55.6)   | (14.6-53.0)   | (30.0-84.0)   |         |
| ≥4-fold increase                                  | 9, 56%       | 10, 59%     | 13, 65%      | 0.86    | 13, 81%       | 11, 65%       | 17, 85%       | 0.35    |
| Pre-existing Ad5>200                              |              |             |              |         |               |               |               |         |
| n                                                 | 20           | 19          | 16           |         | 20            | 19            | 16            |         |
| GMT                                               | 4.8          | 5.7         | 5.3          | 0.72    | 8.0           | 10.0          | 20.8          | 0.031†  |
|                                                   | (3.8-5.9)    | (3.9-8.5)   | (3.5-8.2)    |         | (5.2-12.2)    | (5.6-17.7)    | (11.2-38.7)   |         |
| ≥4-fold increase                                  | 1, 5%        | 1, 5%       | 2, 13%       | 0.67    | 5, 25%        | 7, 37%        | 10, 63%       | 0.070   |
| <b>Neutralization antibodies to pseudovirus</b>   |              |             |              |         |               |               |               |         |
| Pre-existing Ad5≤200                              |              |             |              |         |               |               |               |         |
| n                                                 | 16           | 17          | 20           |         | 16            | 17            | 20            |         |
| GMT                                               | 46.1         | 34.1        | 58.9         | 0.43    | 61.2          | 45.5          | 63.8          | 0.71    |
|                                                   | (19.1-111.5) | (19.5-59.6) | (36.0-96.6)  |         | (31.4-119.3)  | (23.4-88.7)   | (34.4-118.5)  |         |
| ≥4-fold increase                                  | 11, 69%      | 12, 71%     | 18, 90%      | 0.21    | 13, 81%       | 12, 71%       | 16, 80%       | 0.77    |
| Pre-existing Ad5>200                              |              |             |              |         |               |               |               |         |
| n                                                 | 20           | 19          | 16           |         | 20            | 19            | 16            |         |
| GMT                                               | 8.9          | 8.5         | 12.2         | 0.51    | 16.8          | 17.3          | 29.9          | 0.39    |
|                                                   | (5.8-13.9)   | (5.4-13.5)  | (7.1-20.9)   |         | (9.1-30.7)    | (8.8-34.2)    | (14.1-63.3)   |         |
| ≥4-fold increase                                  | 5, 25%       | 5, 26%      | 3, 19%       | 0.85    | 8, 40%        | 7, 37%        | 9, 56%        | 0.47    |

Data are mean (95%CI) or n, %. n = number of participants. % = proportion of participants. ELISA= enzyme-linked immunosorbent assay. RBD= receptor binding domain. GMT= geometric mean antibody titer. The p values are the result of comparison between the three dose groups. \* The difference between high dose and low dose was 0.43%, with 95%CI 0.13%~0.72%. † The difference between high dose and low dose was 23.4, with 95%CI 4.3~42.5.

**Appendix 8. Logistic regression analysis of seroconversion rate of neutralizing antibodies to live SARS-CoV-2 at day 28 post-vaccination with the baseline characters, vaccine dose and pre-existing Ad5 antibodies.**

| Model parameters                   | Estimates | P value | OR              |               |
|------------------------------------|-----------|---------|-----------------|---------------|
|                                    |           |         | Point estimates | 95%CI by Wald |
| <b>Univariate analysis*</b>        |           |         |                 |               |
| Middle dose                        | 0.00      | >0.99   | 1.00            | 0.40, 2.52    |
| High dose                          | 1.10      | 0.031   | 3.00            | 1.11, 8.14    |
| Age                                | 1.17      | 0.011   | 3.22            | 1.30, 7.96    |
| Sex                                | -0.47     | 0.23    | 0.62            | 0.29, 1.35    |
| Pre-existing Ad5 antibodies (>200) | -1.63     | 0.0001  | 0.20            | 0.08, 0.45    |
| <b>Multivariable analysis†</b>     |           |         |                 |               |
| Intercept                          | 0.65      | 0.17    |                 |               |
| Middle dose                        | -0.06     | 0.91    | 0.94            | 0.33, 2.67    |
| High dose                          | 1.02      | 0.074   | 2.76            | 0.91, 8.44    |
| Age                                | 0.68      | 0.011   | 3.88            | 1.37, 11.01   |
| Sex                                | -0.32     | 0.17    | 0.53            | 0.21, 1.31    |
| Pre-existing Ad5 antibodies (>200) | -1.67     | 0.0003  | 0.19            | 0.08, 0.47    |

\*The dose group (the low-dose group as the reference), age (stratified into 18-44, 45-60; using 45-60 years as reference), sex (female as reference), and the level of Ad5 antibodies pre-vaccination ( $\leq 200$  as reference) are analysed in univariate logistic regression, respectively, before involved in a multivariable analysis. † The independent variables are the dose group (the low-dose group as the reference), age (stratified into 18-44, 45-60; using 45-60 years as reference), sex (female as reference), and the level of Ad5 antibodies pre-vaccination ( $\leq 200$  as reference) included in a multivariable analysis.

**Appendix 9. Specific neutralizing antibodies to Ad5 vector at day 14 and 28 post-vaccination according to pre-existing Ad5.**

|                      | Day 14                    |                           |                           |         | Day 28                    |                           |                           |         |
|----------------------|---------------------------|---------------------------|---------------------------|---------|---------------------------|---------------------------|---------------------------|---------|
|                      | Low dose<br>(n=36)        | Middle dose<br>(n=36)     | High dose<br>(n=36)       | P value | Low dose<br>(n=36)        | Middle dose<br>(n=36)     | High dose<br>(n=36)       | P value |
| Total                |                           |                           |                           |         |                           |                           |                           |         |
| GMT                  | 840·6<br>(332·7-2123·5)   | 1429·6<br>(642·5-3181·0)  | 1208·9<br>(595·5-2454·0)  | 0·64    | 672·0<br>(254·9-1771·2)   | 1041·2<br>(467·6-2318·1)  | 898·7<br>(412·6-1957·2)   | 0·76    |
| Pre-existing Ad5≤200 |                           |                           |                           |         |                           |                           |                           |         |
| GMT<                 | 71·9<br>(20·7-249·3)      | 340·6<br>(82·7-1403·6)    | 323·7<br>(130·5-802·6)    | 0·10    | 49·3<br>(14·1-172·4)      | 238·4<br>(60·5-939·5)     | 202·0<br>(76·4-534·2)     | 0·12    |
| Pre-existing Ad5>200 |                           |                           |                           |         |                           |                           |                           |         |
| GMT                  | 6008·9<br>(4537·2-7957·9) | 5159·1<br>(3745·1-7106·9) | 6275·9<br>(4833·1-8149·5) | 0·59    | 5434·1<br>(4029·6-7328·0) | 3893·5<br>(2625·4-5774·1) | 5808·1<br>(4600·0-7333·6) | 0·16    |

Data are mean (95%CI) or n, %. n = number of participants. % = proportion of participants. Ad5= adenovirus type 5. GMT= geometric mean antibody titer. The p values are the result of comparison between the three dose groups.

**Appendix 10. T cells producing combination of INF- $\gamma$ , TNF- $\alpha$ , and IL-2 at day 28 post-vaccination measured by flow cytometry.**

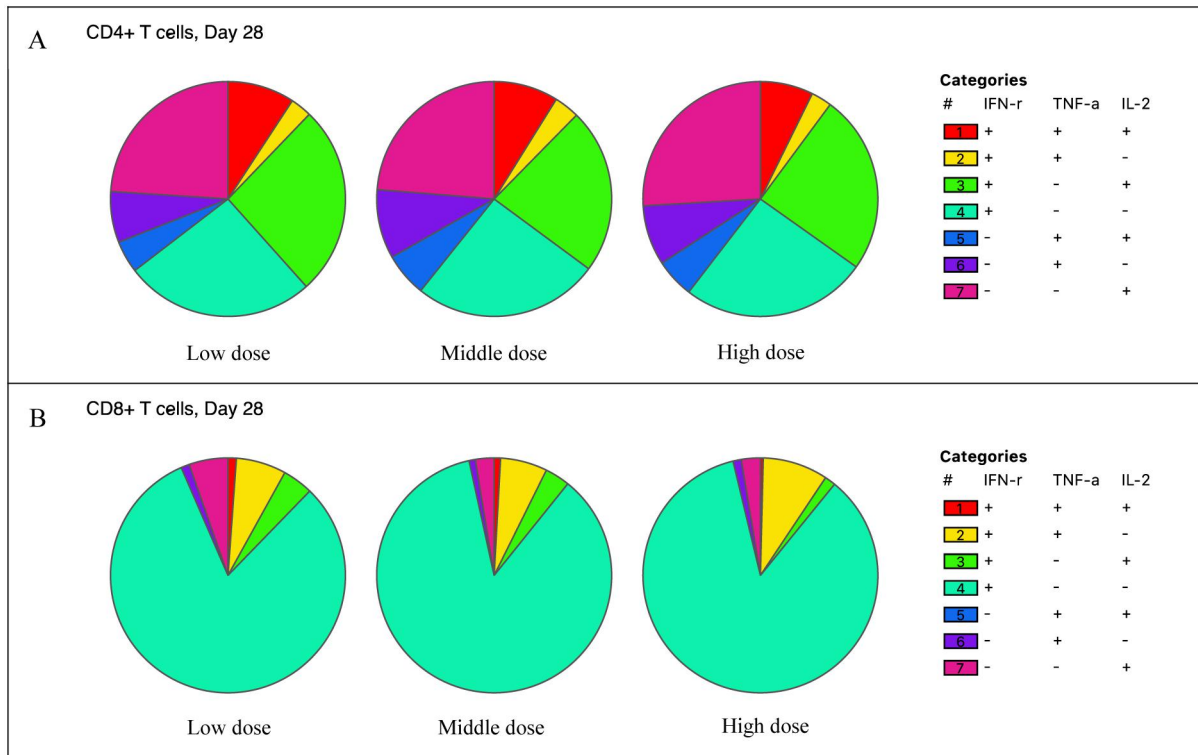

Panel A shows the proportions of CD4+ T cells producing any combination of INF- $\gamma$ , TNF- $\alpha$ , and IL-2 at day 28 post-vaccination. Panel B shows the proportions of CD8+ T cells producing any combination of INF- $\gamma$ , TNF- $\alpha$ , and IL-2 at day 28 post-vaccination.

**Appendix 11. Stratified analyses of the T cell responses based on the pre-existing Ad5 neutralizing antibody titers measured by flow cytometry.**

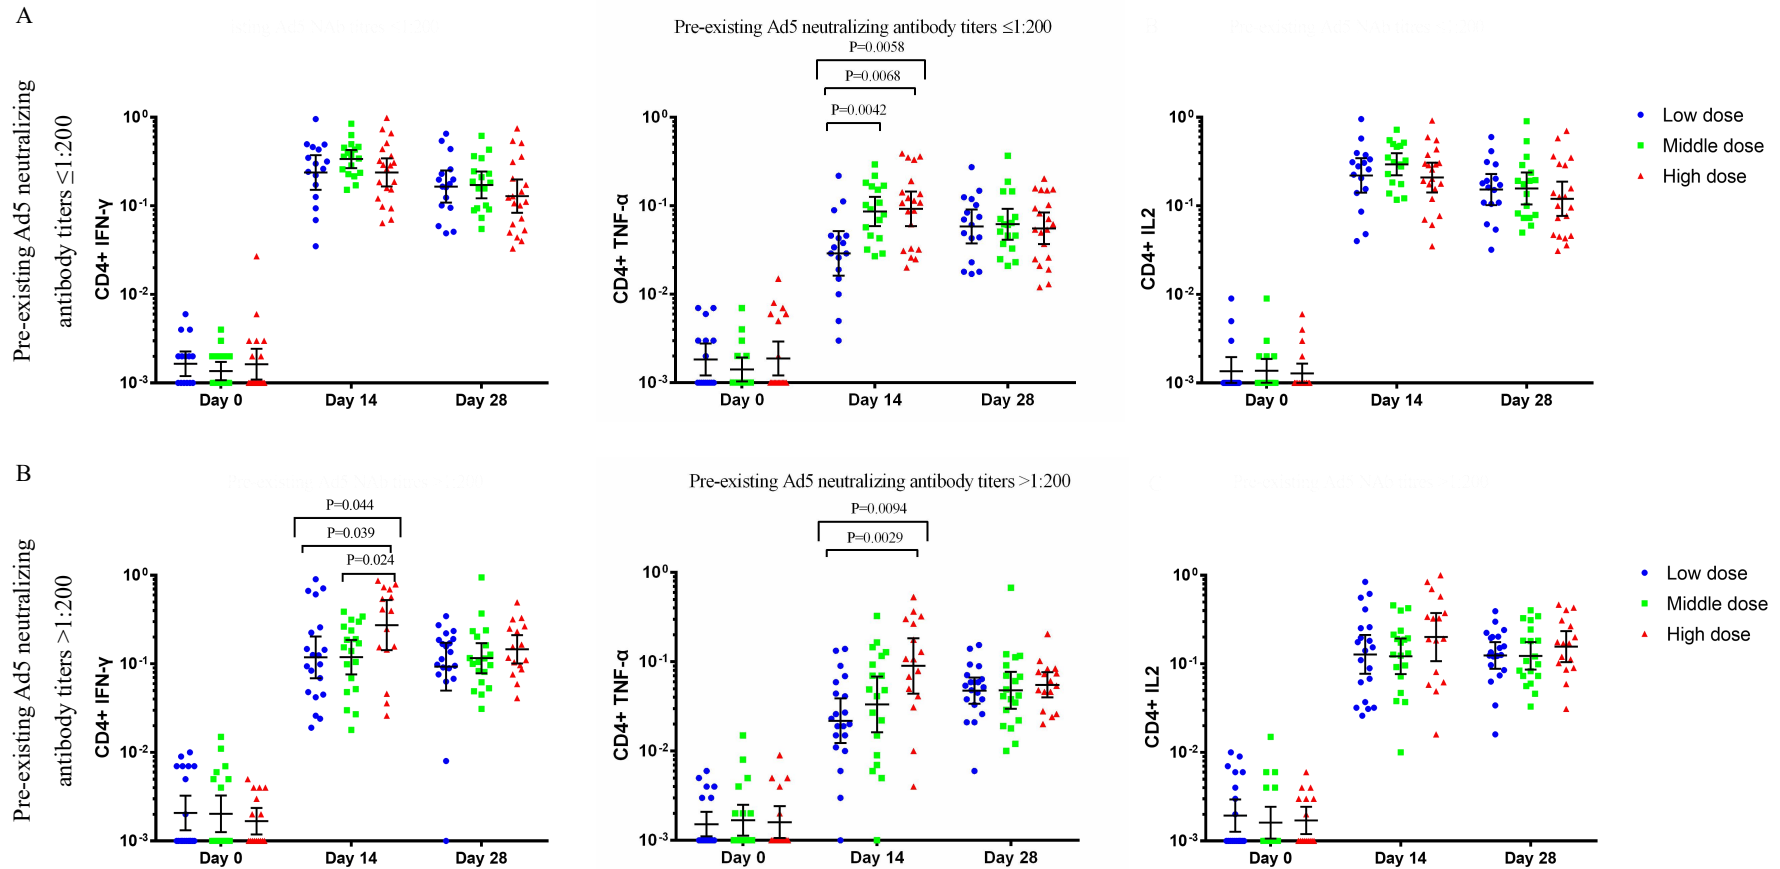

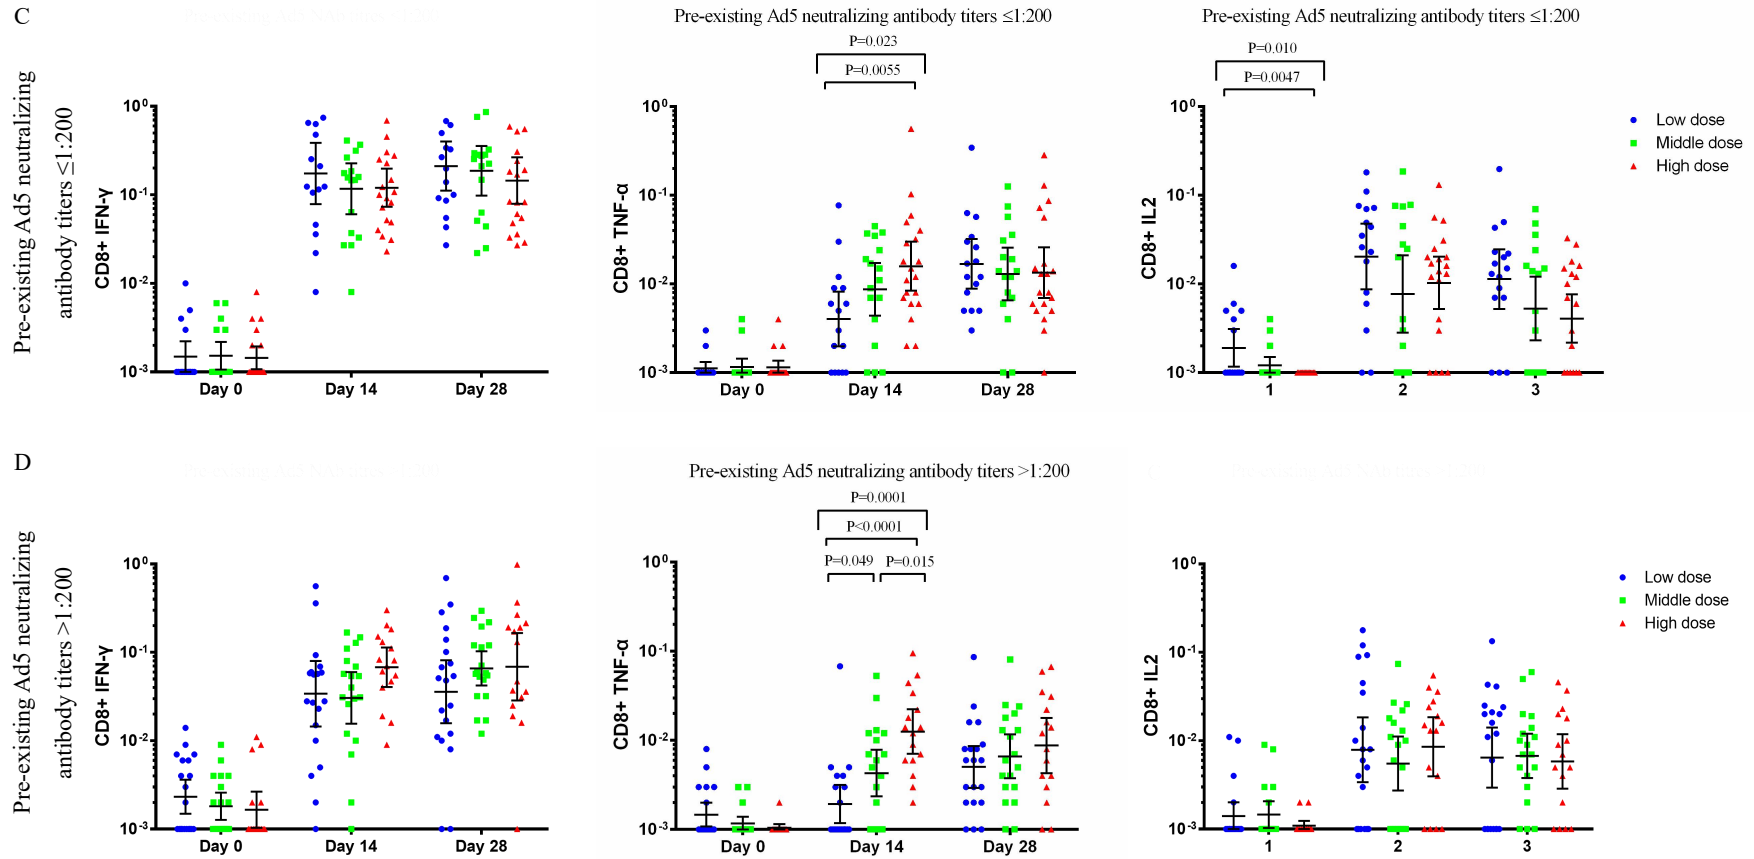

Panel A shows the specific T cell response with secretion of IFN- $\gamma$ , tumor necrosis factor  $\alpha$  (TNF- $\alpha$ ), and interleukin-2 from CD4+ T cells at day 0, 14, and 28 in participants with low pre-existing Ad5 neutralizing antibody titers ( $\leq 1:200$ ) in three dose groups. Panel B shows the specific T cell response with secretion of IFN- $\gamma$ , TNF- $\alpha$ , and interleukin-2 from CD4+ T cells at day 0, 14, and 28 in participants with high pre-existing Ad5 neutralizing antibody titers ( $> 1:200$ ) in three dose groups. Panel C shows the specific T cell response with secretion of IFN- $\gamma$ , TNF- $\alpha$ , and interleukin-2 from CD8+ T cells at day 0, 14, and 28 in participants with low pre-existing Ad5 neutralizing



antibody titers ( $\leq 1:200$ ) in three dose groups. Panel D shows the specific T cell response with secretion of IFN- $\gamma$ , TNF- $\alpha$ , and interleukin-2 from CD8<sup>+</sup> T cells at day 0, 14, and 28 in participants with high pre-existing Ad5 neutralizing antibody titers ( $>1:200$ ) in three dose groups.

**Appendix 12. Proportion of participants with either seroconversion of neutralizing antibodies to live SARS-CoV-2 or a positive T cell response measured by INF- $\gamma$  ELISpot at day 14 and 28 post-vaccination.**

|                                |              | <b>Low dose (n=36)</b> | <b>Middle dose (n=36)</b> | <b>High dose (n=36)</b> | <b>Total (n=108)</b> |
|--------------------------------|--------------|------------------------|---------------------------|-------------------------|----------------------|
| <b>Day 14 post-vaccination</b> |              |                        |                           |                         |                      |
| <b>Seroconversion</b>          | <b>n (%)</b> | 30 (83)                | 35 (97)                   | 35 (97)                 | 100 (93)             |
| <b>Seroconversion rate CI</b>  | <b>95%CI</b> | 68.1, 92.1             | 85.8, 99.5                | 85.8, 99.5              | 86.1, 96.2           |
| <b>Day 28 post-vaccination</b> |              |                        |                           |                         |                      |
| <b>Seroconversion</b>          | <b>n (%)</b> | 28 (78)                | 33 (92)                   | 36 (100)                | 97 (90)              |
| <b>Seroconversion rate CI</b>  | <b>95%CI</b> | 61.9, 88.3             | 78.2, 97.1                | 90.4, 100.0             | 82.7, 94.2           |

n (%), n = number of participants. % = proportion of participants. A positive antibody response (seroconversion) was defined as at least a 4-fold increase in post-vaccination titer from baseline. The ELISpot T cell responses were considered positive if at least 2-fold increase in the numbers of IFN- $\gamma$ -secreting T cells was found post-vaccination compared to the baseline.
